# Supplementary material for: Frequently Consumed Foods and Energy Contributions among Food Secure and Insecure U.S. Children and Adolescents
Source: PubMed Central journal article supplement (PMC7070395; doi:10.3390/nu12020304), 2020-01-23
Supplement: nutrients-12-00304-s001.pdf [file nutrients-12-00304-s001.pdf]

**Supplemental Table 1.** Top 25 most frequently consumed foods or beverages, unweighted frequency of reported foods or beverages, weighted percent of reported foods or beverages, and standard error of weighted percent of reported foods or beverages among all reported foods or beverages for food secure, low, and very low food secure U.S. children and adolescents aged 6-11 and 12-17 years using the National Health and Nutrition Examination Survey 2007–2014.

| Rank  | 6-11 Years (n = 4,510)    |                   |                           |                                          |                      |                           | 12-17 Years (n = 3,686)                  |                   |                           |                           |                      |                           |                                          |                   |                           |                           |                   |                           |
|-------|---------------------------|-------------------|---------------------------|------------------------------------------|----------------------|---------------------------|------------------------------------------|-------------------|---------------------------|---------------------------|----------------------|---------------------------|------------------------------------------|-------------------|---------------------------|---------------------------|-------------------|---------------------------|
|       | Food Secure               |                   | Low Food Secure           |                                          | Very Low Food Secure |                           | Food Secure                              |                   | Low Food Secure           |                           | Very Low Food Secure |                           |                                          |                   |                           |                           |                   |                           |
|       | Food Code <sup>a</sup>    | Freq <sup>b</sup> | Wtd % <sup>c,d</sup> (SE) | Food Code <sup>a</sup>                   | Freq <sup>b</sup>    | Wtd % <sup>c,d</sup> (SE) | Food Code <sup>a</sup>                   | Freq <sup>b</sup> | Wtd % <sup>c,d</sup> (SE) | Food Code <sup>a</sup>    | Freq <sup>b</sup>    | Wtd % <sup>c,d</sup> (SE) | Food Code <sup>a</sup>                   | Freq <sup>b</sup> | Wtd % <sup>c,d</sup> (SE) | Food Code <sup>a</sup>    | Freq <sup>b</sup> | Wtd % <sup>c,d</sup> (SE) |
| Total |                           | 58,077            | 100                       |                                          | 7,322                | 100                       |                                          | 1,146             | 100                       |                           | 41,404               | 100                       |                                          | 5,187             | 100                       |                           | 981               | 100                       |
| 1     | Tap Water                 | 3,041             | 5.8 (0.3)                 | Tap Water                                | 339                  | 4.7 (0.4)                 | Tap Water                                | 50                | 4.2 (0.4)                 | Tap Water                 | 2,143                | 5.9 (0.3)                 | Tap Water                                | 222               | 4.5 (0.5)                 | Unsweetened Bottled Water | 50                | 5.2 (0.6)                 |
| 2     | Unsweetened Bottled Water | 1,989             | 2.9 (0.2)                 | Unsweetened Bottled Water                | 304                  | 4.1 (0.6)                 | Unsweetened Bottled Water                | 41                | 4.0 (0.6)                 | Unsweetened Bottled Water | 1,841                | 4.1 (0.2)                 | Unsweetened Bottled Water                | 218               | 4.0 (0.5)                 | Tap Water                 | 30                | 3.5 (0.2)                 |
| 3     | 2% Cow's Milk             | 1,560             | 2.7 (0.2)                 | 2% Cow's Milk                            | 167                  | 2.2 (0.3)                 | 2% Cow's Milk                            | 45                | 4.0 (0.4)                 | 2% Cow's Milk             | 889                  | 2.5 (0.2)                 | 2% Cow's Milk                            | 117               | 2.6 (0.4)                 | Raw Lettuce               | 18                | 2.5 (0.2)                 |
| 4     | Tomato Catsup             | 1,046             | 1.8 (0.1)                 | Tomato Catsup                            | 154                  | 1.9 (0.2)                 | Raw Apple                                | 21                | 1.9 (0.3)                 | Tomato Catsup             | 680                  | 1.6 (0.1)                 | Cola-Type Soft Drink                     | 108               | 2.2 (0.3)                 | Cola-Type Soft Drink      | 29                | 2.5 (0.3)                 |
| 5     | Whole Cow's Milk          | 901               | 1.3 (0.1)                 | White Bread                              | 100                  | 1.6 (0.2)                 | Fruit Flavored Drink From Powder         | 11                | 1.6 (0.9)                 | Cola-Type Soft Drink      | 639                  | 1.5 (0.1)                 | Fruit-Flavored, Caffeine Free Soft Drink | 109               | 1.5 (0.2)                 | Whole Cow's Milk          | 12                | 1.7 (0.1)                 |
| 6     | 1% Cow's Milk             | 550               | 1.3 (0.1)                 | Whole Cow's Milk                         | 126                  | 1.6 (0.3)                 | Fruit-Flavored, Caffeine Free Soft Drink | 17                | 1.5 (0.3)                 | Raw Lettuce               | 542                  | 1.3 (0.1)                 | Raw Lettuce                              | 69                | 1.3 (0.2)                 | Raw Banana                | 13                | 1.7 (0.2)                 |
| 7     | Raw Apple                 | 695               | 1.2 (0.1)                 | Fruit-Flavored, Caffeine Free Soft Drink | 121                  | 1.5 (0.2)                 | Cola-Type Soft Drink                     | 16                | 1.5 (0.4)                 | Soft White Roll           | 422                  | 1.2 (0.1)                 | Raw Apple                                | 54                | 1.3 (0.2)                 | 2% Cow's Milk             | 25                | 1.7 (0.3)                 |
| 8     | Fruit-Flavored,           | 741               | 1.0 (0.1)                 | Cola-Type Soft Drink                     | 91                   | 1.3 (0.3)                 | Raw Lettuce                              | 15                | 1.5 (0.2)                 | Fruit-Flavored,           | 645                  | 1.0 (0.1)                 | Tomato Catsup                            | 81                | 1.2 (0.2)                 | Soft White Roll           | 9                 | 1.6 (0.2)                 |

| Caffeine Free Soft Drink |                           |     |           |                                  |    |           |                        |    |           | Caffeine Free Soft Drink  |     |           |                                  |    |           |                                            |    |           |  |
|--------------------------|---------------------------|-----|-----------|----------------------------------|----|-----------|------------------------|----|-----------|---------------------------|-----|-----------|----------------------------------|----|-----------|--------------------------------------------|----|-----------|--|
| 8                        | Soft White Roll           | 568 | 1.0 (0.1) | Raw Apple                        | 82 | 1.2 (0.2) | Raw Banana             | 14 | 1.4 (0.3) | Raw Apple                 | 427 | 1.0 (0.1) | White Bread                      | 70 | 1.2 (0.2) | Brewed, Pre-sugared or Deli Black Iced Tea | 7  | 1.6 (0.1) |  |
| 9                        | Cola-Type Soft Drink      | 613 | 0.9 (0.1) | 1% Cow's Milk                    | 68 | 1.1 (0.2) | Soft White Roll        | 12 | 1.4 (0.5) | 1% Cow's Milk             | 386 | 1.0 (0.1) | White Sugar                      | 41 | 1.0 (0.2) | Prepackaged or Deli Sliced Ham             | 9  | 1.4 (0.1) |  |
| 10                       | White Bread               | 564 | 0.9 (0.1) | White Potato French Fries        | 78 | 1.0 (0.1) | White Bread            | 15 | 1.4 (0.2) | White Bread               | 421 | 0.9 (0.1) | Orange Juice                     | 47 | 0.9 (0.2) | Fast Food White Potato French Fries        | 8  | 1.4 (0.1) |  |
| 11                       | Apple Juice               | 525 | 0.8 (0.1) | Reduced Sugar Fruit Juice Drink  | 40 | 1.0 (0.2) | Orange Juice w/Calcium | 14 | 1.3 (0.2) | Skim Cow's Milk           | 226 | 0.9 (0.1) | Soft White Roll                  | 51 | 0.9 (0.2) | Raw Tomatoes                               | 14 | 1.3 (0.2) |  |
| 12                       | Skim Cow's Milk           | 256 | 0.8 (0.1) | Apple Juice                      | 77 | 0.9 (0.2) | Whole Cow's Milk       | 20 | 1.3 (0.2) | Whole Cow's Milk          | 404 | 0.9 (0.1) | Fruit Flavored Drink From Powder | 57 | 0.9 (0.2) | White Sugar                                | 9  | 1.2 (0.2) |  |
| 13                       | White Potato French Fries | 534 | 0.8 (0.1) | Corn Tortilla Chips              | 60 | 0.8 (0.2) | Raw Orange             | 10 | 1.1 (0.4) | Corn Tortilla Chips       | 379 | 0.9 (0.1) | Whole Cow's Milk                 | 56 | 0.9 (0.2) | White Bread                                | 12 | 1.0 (0.1) |  |
| 14                       | Raw Lettuce               | 458 | 0.8 (0.1) | Soft White Roll                  | 62 | 0.8 (0.2) | Tomato Catsup          | 14 | 1.1 (0.2) | Fruit Flavored Soft Drink | 245 | 0.8 (0.1) | Wheat Bread                      | 33 | 0.8 (0.2) | Mayonnaise                                 | 14 | 1.0 (0.2) |  |
| 15                       | Corn Tortilla Chips       | 442 | 0.7 (0.1) | Mayonnaise                       | 39 | 0.8 (0.2) | Peanut Butter          | 11 | 1.0 (0.2) | Raw Tomatoes              | 317 | 0.8 (0.1) | Fruit-Flavored Soft Drink        | 34 | 0.8 (0.3) | Raw Apple                                  | 10 | 1.0 (0.3) |  |
| 16                       | Peanut Butter             | 334 | 0.7 (0.1) | Fruit Flavored Drink From Powder | 64 | 0.8 (0.2) | Ice Cream              | 9  | 1.0 (0.2) | White Potato French Fries | 376 | 0.8 (0.1) | White Potato French Fries        | 56 | 0.8 (0.1) | Ground Beef or Patty                       | 6  | 1.0 (0.1) |  |

|    |                                  |     |              |                      |    |              |                         |    |              |                       |     |              |                                |    |              |                                         |    |              |
|----|----------------------------------|-----|--------------|----------------------|----|--------------|-------------------------|----|--------------|-----------------------|-----|--------------|--------------------------------|----|--------------|-----------------------------------------|----|--------------|
| 17 | Hard Candy                       | 418 | 0.7<br>(0.1) | American Cheese      | 45 | 0.8<br>(0.3) | White Sugar             | 10 | 1.0<br>(0.4) | Red, Cooked Salsa     | 312 | 0.7<br>(0.1) | Raw Tomatoes                   | 37 | 0.8<br>(0.2) | Tomato Catsup                           | 11 | 1.0<br>(0.1) |
| 18 | Fruit Juice Drink                | 504 | 0.7<br>(0.0) | Fruit Juice Drink    | 55 | 0.7<br>(0.1) | 2% Chocolate Milk       | 5  | 0.9<br>(0.3) | Chocolate Chip Cookie | 282 | 0.6<br>(0.1) | Corn Puffs or Twists           | 35 | 0.7<br>(0.2) | Creamy Dressing                         | 5  | 1.0<br>(0.3) |
| 19 | Raw Grapes                       | 316 | 0.6<br>(0.1) | Peanut Butter        | 41 | 0.7<br>(0.2) | Raw Carrots             | 7  | 0.8<br>(0.2) | American Cheese       | 243 | 0.6<br>(0.1) | American Cheese                | 29 | 0.6<br>(0.1) | Breaded Chicken Patty Fillet or Tenders | 5  | 1.0<br>(0.1) |
| 20 | Chocolate Chip Cookie            | 305 | 0.6<br>(0.1) | Orange Juice         | 51 | 0.6<br>(0.1) | Corn Tortilla           | 11 | 0.8<br>(0.1) | Raw Banana            | 238 | 0.6<br>(0.1) | Mustard                        | 29 | 0.6<br>(0.1) | Mustard                                 | 5  | 0.9<br>(0.1) |
| 21 | Raw Banana                       | 398 | 0.6<br>(0.0) | Raw Lettuce          | 48 | 0.6<br>(0.1) | Ready-To-Eat Cereal     | 9  | 0.8<br>(0.3) | Ice Cream             | 227 | 0.6<br>(0.1) | Chocolate Chip Cookie          | 35 | 0.6<br>(0.1) | Red, Cooked Salsa                       | 8  | 0.8<br>(0.1) |
| 22 | Ice Cream                        | 325 | 0.6<br>(0.0) | Ground Beef or Patty | 31 | 0.6<br>(0.2) | Red Cooked Salsa        | 9  | 0.8<br>(0.3) | Orange Juice          | 304 | 0.5<br>(0.1) | Prepackaged or Deli Sliced Ham | 37 | 0.6<br>(0.1) | M&M's Milk Chocolate Candies            | 2  | 0.8<br>(0.1) |
| 23 | Reduced Sugar Fruit Juice Drink  | 376 | 0.6<br>(0.1) | Snack Cracker        | 22 | 0.6<br>(0.2) | Apple Juice             | 7  | 0.7<br>(0.3) | Ground Beef or Patty  | 220 | 0.5<br>(0.1) | Corn Tortilla Chips            | 38 | 0.6<br>(0.1) | Fruit Juice Drink                       | 6  | 0.8<br>(0.1) |
| 24 | Fruit Flavored Drink From Powder | 373 | 0.6<br>(0.1) | 2% Chocolate Milk    | 40 | 0.6<br>(0.2) | Raw Tomatoes            | 10 | 0.7<br>(0.2) | Peanut Butter         | 161 | 0.5<br>(0.1) | Mayonnaise                     | 29 | 0.6<br>(0.1) | American Cheese                         | 5  | 0.8<br>(0.2) |
| 25 | Orange Juice                     | 347 | 0.5<br>(0.1) | Ice Cream            | 30 | 0.5<br>(0.1) | Thin Crust Cheese Pizza | 5  | 0.7<br>(0.2) | Apple Juice           | 240 | 0.5<br>(0.1) | Orange Juice w/Calcium         | 19 | 0.6<br>(0.2) | Fruit-Flavored Soft Drink               | 10 | 0.8<br>(0.2) |

<sup>a</sup>U.S. Department of Agriculture Long Food Code Description, order of words may be rearranged to improve readability <sup>b</sup> The frequency that a food or beverages was reported without dietary weights. <sup>c</sup> Survey weights and adjustments for the complex survey design were applied to represent the non-institutionalized U.S. population. <sup>d</sup> Derived from the estimated weighted frequency of the individual food or beverage divided by the total weighted frequency of all foods and beverages (*n*) reported in a single day, where *n* = 335,995,769 for food secure 6–11 years, *n* = 31,155,106 for low food secure 6–11 years, *n* = 4,126,641 for very low food secure 6–11 years, *n* = 290,965,789 for food secure 12–17 years, *n* = 28,444,012 for low food secure 12–17 years, *n* = 4,749,595 for very low food secure 12–17 years. Estimated weighted percent has been abbreviated by “Wtd %”; SE=Standard Error.
